# Supplementary material
Source: PubMed Central journal article supplement (PMC3318819)
Supplement: supp_78.8.2602_AEM7658-11_TableS1.pdf [file supp_78.8.2602_AEM7658-11_TableS1.pdf]

Supplemental Table 1. Q-PCR primers and probes used in this study.

| Target Gene   | Forward Primer (5' → 3')   | Probe (5' → 3')            | Reverse Primer (5' → 3')      | Source    |
|---------------|----------------------------|----------------------------|-------------------------------|-----------|
| <i>rpoB</i>   | CCGGACGTCACGGTAACAA        | TTATCTCCCGTATTTTACC        | CAGGTGTTCCGTCTGGCATA          | (1)       |
| <i>betL</i>   | GCACCTGATGCGCCTGAT         | TTGACTCATGGACTATTT         | GAAAGCCACCAAGCCCAAT           | (1)       |
| <i>bsh</i>    | GGCCTTAGTATGGCAGGACTCA     | CCTTGTAATCCGCATTTTCTGAGAA  | CTCATTGTCCTTACCTTCTGCAAA      | (8)       |
| <i>ctc</i>    | CAGTTTCCGTTGATTCTTTTGGAAA  | CGCCGTATTTTCA              | AATTTCTTGCCGTCCACAGTAAC       | (7)       |
| <i>dnaK</i>   | CCTTACTCGTGCTAAATTTGATGAAC | TAACACATGACTTAGTTGAAC      | TGACGAGTTGGCGCAATAGTAC        | (4)       |
| <i>gbuA</i>   | GAAAAAGCATGAGTATGGTCTTCCA  | AACTTTGGTTTATTTCCG         | TTTGTCATTCTTGAATTTCAAG        | (1)       |
| <i>groES</i>  | CGTTTCAGGTCGTGTGCTAGA      | CGGAACAAAAGAACCAC          | TGTGTCACCTTCTGCAACTTCA        | (4)       |
| <i>hly</i>    | ATGGCACACCAGCATCTC         | CCTGCAAGTCTTAAGAC          | ATCCGCGTGTTCCTTTTCGAT         | (3)       |
| <i>inlA</i>   | GACAAATGCTCAGGCAGCTACA     | CAGCTCTAGCGGAAAA           | TTTGCAGACCGTGTCTGTTA          | (6)       |
| <i>kat</i>    | CATCGTGTAGGGCCAAACTACTT    | AACTCCCAATTAACAGTCC        | TCGCGACAGGCGCTTT              | This work |
| <i>liaH</i>   | GAAGAAGTGGCTCAATATGAAGAA   | TTAGAAGTACAAAAGCAC         | TGTTCCGACGCTTGATCGTA          | This work |
| <i>liaR</i>   | GGCGGAGACTCTGTTCTTGAA      | CAGAAGTAACTGGC             | TAGCGTTAGCCGTT                | This work |
| <i>oppA</i>   | GAAGATGCAAAATGGTCAAACG     | CCTGTAAGTCAAAATGACTAT      | TGCACGACGCCATGAGTAA           | (2)       |
| <i>opuCA</i>  | ACATCGATAAAGGAGAATTTGTTTGT | TCGTTTTCCACAACCA           | GCCGGTTAATCATCTTCATTGTT       | (1)       |
| <i>plcA</i>   | GATTTATTTACGACGCACATTAGTTT | CCCATTAGGCGGAAAAGCATATTCGC | GAGTTCCTTATTGGCTTATTCCAGTTATT | (5)       |
| LMOh7858_1689 | GCTTGGTCTGGTACATGTTATCGA   | CGCGCGTTTTTCAT             | CATGCTTGTATCGTAATTGGCTACA     | This work |
| LMOh7858_3012 | GGCAAAGAATTACCAAAGA        | AGTACGTAGAAACCC            | CGTAACCAATTAACCGGATACATGT     | This work |
| lmo2754       | CCCTTGAGTAAGTGGCTTCTT      | CCGAAAAGCAGCACAAAG         | TGCGTTTGCATTTAGATTTGG         | This work |
| lmo2812       | GGGATGAAAAGCTTGATCTTGTTT   | TTGGATGATCCTTCCGC          | TGTAATCGCGTAAAGGGAAACC        | This work |

References:

1. **Bergholz, T. M., H. C. den Bakker, E. D. Fortes, K. J. Boor, and M. Wiedmann.** 2010. Salt stress phenotypes in *Listeria monocytogenes* vary by genetic lineage and temperature. *Foodborne Pathog Dis* **7**:1537-49.
2. **Chan, Y. C., S. Raengpradub, K. J. Boor, and M. Wiedmann.** 2007. Microarray-based characterization of the *Listeria monocytogenes* cold regulon in log- and stationary-phase cells. *Appl Environ Microbiol* **73**:6484-98.
3. **Chaturongakul, S., and K. J. Boor.** 2006. SigmaB activation under environmental and energy stress conditions in *Listeria monocytogenes*. *Appl Environ Microbiol* **72**:5197-203.
4. **Hu, Y., H. F. Oliver, S. Raengpradub, M. E. Palmer, R. H. Orsi, M. Wiedmann, and K. J. Boor.** 2007. Transcriptomic and phenotypic analyses suggest a network between the transcriptional regulators HrcA and sigmaB in *Listeria monocytogenes*. *Appl Environ Microbiol* **73**:7981-91.
5. **Kazmierczak, M. J., M. Wiedmann, and K. J. Boor.** 2006. Contributions of *Listeria monocytogenes* sigmaB and PrfA to expression of virulence and stress response genes during extra- and intracellular growth. *Microbiology* **152**:1827-38.

6. **Oliver, H. F., R. H. Orsi, M. Wiedmann, and K. J. Boor.** 2010. *Listeria monocytogenes* {sigma}B has a small core regulon and a conserved role in virulence but makes differential contributions to stress tolerance across a diverse collection of strains. *Appl Environ Microbiol* **76**:4216-32.
7. **Raengpradub, S., M. Wiedmann, and K. J. Boor.** 2008. Comparative analysis of the sigma B-dependent stress responses in *Listeria monocytogenes* and *Listeria innocua* strains exposed to selected stress conditions. *Appl Environ Microbiol* **74**:158-71.
8. **Sue, D., D. Fink, M. Wiedmann, and K. J. Boor.** 2004. sigmaB-dependent gene induction and expression in *Listeria monocytogenes* during osmotic and acid stress conditions simulating the intestinal environment. *Microbiology* **150**:3843-55.
