# Supplementary material
Source: PubMed Central journal article supplement (PMC3318819)
Supplement: supp_78.8.2602_AEM7658-11_TableS2.pdf [file supp_78.8.2602_AEM7658-11_TableS2.pdf]

Supplemental Table 2. Splice by Overlap Extension PCR (SOEing-PCR) primers for mutant creation

| Primer                                    | Sequence (5'→3')                                     |
|-------------------------------------------|------------------------------------------------------|
| LMOh7858_1017 ( <i>liaH</i> )             |                                                      |
| TB88 soeA                                 | GGGGTCGACGCGATGATACTTATAGTTTTATTGCC                  |
| TB89 soeB                                 | TTCCTAACTTCTTTATTCCATTGTTT                           |
| TB90 soeC                                 | AAACAATGGAATAAAGAAGTTAGTGAAAAAAAAAGAAGAAGAAAACGAAACA |
| TB91 soeD                                 | GTA CTGCAGAATCAGCCATCGAGCCAAC                        |
| TB92 <i>liaH</i> XF                       | AGGTGGCGTTTCATCTCTTC                                 |
| TB93 <i>liaH</i> XR                       | TGTGTCGCTTTACTTGTTTTCA                               |
| LMOh7858_1089 ( <i>liaR</i> )             |                                                      |
| BB7 soeA                                  | GGGGTACCTGCCAATCGAAGTAGAATGGC                        |
| BB8 soeB                                  | TATCATTGCTTTCCACGTCC                                 |
| TB84 soeC                                 | GGACGTGGAAAGCGAATGATACATGACTTAGTAGAAAAAAGTAGCA       |
| TB85 soeD                                 | GGAAGCTTGGCATGTTTATCATTGTCGC                         |
| TB86 <i>liaR</i> XF                       | GATGCGGGCGCTTTTACTTCA                                |
| TB87 <i>liaR</i> XR                       | TCTCGCTCAGGATGGACAACC                                |
| LMOh7858_1689                             |                                                      |
| TB48 soeA                                 | GGGGTCGACCTTGACAAAAATCAGCGTCTT                       |
| TB49 soeB                                 | TCCATCAACTGCTACTAAACTCT                              |
| TB50 soeC                                 | AGAGTTTTAGTAGCAGTTGATGGATTGTAGTACGTAATGATGTTCTT      |
| TB51 soeD                                 | GTA CTGCAGTTCGTGATTTAGAAGATGAAGCA                    |
| TB52 1689 XF                              | ATTGCCCCAGCAACTTCACTCAT                              |
| TB53 1689 XR                              | CCC TCGCTTATTCC TTTTCA T CA                          |
| LMOh7858_2527-2533 ( <i>mrpABCDEFGF</i> ) |                                                      |
| BB399 soeA                                | CGCGGATCCCCATTTATTGTGGCACTGCTAATTCC                  |
| BB400 soeB                                | CCAATCAATAAGAACGAACTAATGGA                           |
| BB401 soeC                                | TCCATTAGTTCGTTCTTATTGATTGGGACTGAATCAGACGATGATAAAACG  |
| BB402 soeD                                | GCTCTAGAGCCGTTGTTCAATTAGAAGTGACAG                    |
| BB403 Mrp XF                              | CACATTTCCAGGATGAGTTTCCG                              |
| TB43 Mrp XR                               | AGCCCGTATTCAATTGCGAGTGTT                             |
| LMOh7858_3019                             |                                                      |
| TB77 soeA                                 | GGGGTCGACTTCCACTGAAAGCCAAATCG                        |
| TB78 soeB                                 | TTTCGGGCTTACTAAGAAGCC                                |
| TB79 soeC                                 | GGCTTCTTAGTAAGCCCGAAAGGCATTGGTAATTACGTTTCTGAT        |
| TB80 soeD                                 | GTA CTGCAGCTTTGTTTGTGCTTGTAGGAGTTCT                  |
| TB81 3019 XF                              | ATGGCGACAATGTGCAAATAATA                              |
| TB82 3019 XR                              | TGTTGCGGATATAGATGCTGATT                              |
| LMOh7858_3076                             |                                                      |

|             |                                              |
|-------------|----------------------------------------------|
| TB94 soeA   | GAGGGATCCTTATCGAAAATAAATGAGGAGCATCA          |
| TB95 soeB   | GGAACAGCTGAACGTGGAGGA                        |
| TB96 soeC   | TCCTCCACGTTTCAGCTGTTCCCTGTGGAACAGGATGAGAGCAG |
| TB97 soeD   | GTACTGCAGAATTGTTAGTATTTTGAAGGTTATCCATAG      |
| TB98 3076XF | TGCCCGCTTGGTATTGTTTCGTAT                     |
| TB99 3076XR | TCCCGGCGGTGTTGAGATTG                         |

---
